# Supplementary material for: Myosteatosis Differentially Affects the Prognosis of Non-Metastatic Colon and Rectal Cancer Patients: An Exploratory Study
Source: PubMed Central journal article supplement (PMC8632142; doi:10.3389/fonc.2021.762444), 2021-11-11
Supplement: DataSheet_1.pdf [file DataSheet_1.pdf]

*Supplementary Material*

# 1 Supplementary table 1. Body composition and inflammatory indexes according to myosteatorsis of stage I-III colon cancer patients.

| Characteristic                                       | All-patients,<br>n=118 | No myosteatorsis, n=32 | Myosteatorsis,<br>n=86 | P value                      |
|------------------------------------------------------|------------------------|------------------------|------------------------|------------------------------|
| <b>Skeletal muscle</b>                               |                        |                        |                        |                              |
| <i>Area (cm<sup>2</sup>), mean (SD)</i>              |                        |                        |                        |                              |
| All Patients                                         | 120.8 (31.8)           | 127.7 (32.8)           | 118.3 (31.3)           | 0.155 <sup>a</sup>           |
| Female                                               | 97.5 (19.6)            | 100.9 (15.0)           | 96.2 (21.1)            | 0.422 <sup>a</sup>           |
| Male                                                 | 141.9 (25.4)           | 154.5 (21.4)           | 137.5 (25.5)           | <b>0.020<sup>a</sup></b>     |
| <i>Radiodensity (HU), mean (SD)</i>                  |                        |                        |                        |                              |
| All Patients                                         | 32.2 (9.3)             | 43.7 (6.0)             | 27.8 (6.0)             |                              |
| Female                                               | 31.1 (9.7)             | 42.7 (6.3)             | 26.5 (6.4)             |                              |
| Male                                                 | 33.1 (8.9)             | 44.8 (5.6)             | 29.0 (5.5)             |                              |
| <i>SMI (cm<sup>2</sup>/m<sup>2</sup>), mean (SD)</i> |                        |                        |                        |                              |
| All Patients                                         | 45.4 (9.3)             | 47.8 (9.3)             | 44.5 (9.3)             | 0.101 <sup>a</sup>           |
| Female                                               | 40.4 (7.3)             | 41.4 (6.7)             | 40.1 (7.6)             | 0.569 <sup>a</sup>           |
| Male                                                 | 49.7 (8.8)             | 53.8 (7.3)             | 48.4 (8.9)             | <b>0.037<sup>a</sup></b>     |
| <i>IMAT, area (cm<sup>2</sup>), median (IQR)</i>     |                        |                        |                        |                              |
| All Patients                                         | 8.4 (5.3–12.8)         | 4.6 (3.3–5.7)          | 10.7 (7.0–14.5)        | <b>&lt;0.001<sup>b</sup></b> |
| Female                                               | 8.2 (5.1–14.2)         | 4.0 (2.5–6.2)          | 11.0 (6.1–17.7)        | <b>&lt;0.001<sup>b</sup></b> |
| Male                                                 | 8.4 (5.4–12.3)         | 4.8 (3.9–5.7)          | 10.3 (7.7–13.2)        | <b>&lt;0.001<sup>b</sup></b> |
| <b>Visceral adipose tissue</b>                       |                        |                        |                        |                              |
| <i>VAT area (cm<sup>2</sup>), median (IQR)</i>       |                        |                        |                        |                              |
| All Patients                                         | 95.1 (40.6–166.4)      | 74.5 (33.2–139.5)      | 101.9 (48.3–171.1)     | 0.125 <sup>b</sup>           |

|                                                          |                          |                          |                          |                    |
|----------------------------------------------------------|--------------------------|--------------------------|--------------------------|--------------------|
| Female                                                   | 81.9 (37.4–130.1)        | 47.6 (27.9–93.3)         | 95.1 (42.2–136.0)        | 0.092 <sup>b</sup> |
| Male                                                     | 112.1 (51.6–193.6)       | 95.3 (46.2–160.7)        | 117.8 (51.6–204.9)       | 0.499 <sup>b</sup> |
| <i>VATI (cm<sup>2</sup>/m<sup>2</sup>), median (IQR)</i> |                          |                          |                          |                    |
| All Patients                                             | 36.3 (16.9–60.4)         | 28.5 (14.1–48.2)         | 40.0 (18.6–62.0)         | 0.170 <sup>b</sup> |
| Female                                                   | 32.8 (15.6–51.3)         | 17.5 (13.5–34.5)         | 39.4 (19.2–57.0)         | 0.079 <sup>b</sup> |
| Male                                                     | 40.2 (19.9–71.7)         | 36.3 (21.6–60.4)         | 40.5 (18.6–72.9)         | 0.675 <sup>b</sup> |
| <i>VAT attenuation (HU), median (IQR)</i>                |                          |                          |                          |                    |
| All Patients                                             | -93.4 (-100.3 to -83.3)  | -92.2 (-99.17 to -86.19) | -93.9 (-100.6 to -82.8)  | 0.846 <sup>b</sup> |
| Female                                                   | -93.7 (-101.0 to -83.0)  | -92.2 (-101.3 to -81.1)  | -94.3 (-99.9 to -83.1)   | 0.957 <sup>b</sup> |
| Male                                                     | -93.1 (-99.5 to -83.3)   | -92.5 (-96.7 to -87.8)   | -93.1 (-102.2 to -82.8)  | 0.898 <sup>b</sup> |
| <b>Subcutaneous adipose tissue</b>                       |                          |                          |                          |                    |
| <i>SAT area (cm<sup>2</sup>), median (IQR)</i>           |                          |                          |                          |                    |
| All Patients                                             | 118.8 (83.3–199.1)       | 114.2 (94.1–164.7)       | 128.0 (76.3–199.9)       | 0.746 <sup>b</sup> |
| Female                                                   | 178.6 (105.5–256.3)      | 154.6 (94.1–250.7)       | 182.0 (116.0–271.0)      | 0.404 <sup>b</sup> |
| Male                                                     | 102.5 (54.9–140.6)       | 108.2 (79.4–117.3)       | 93.8 (51.2–150.1)        | 0.640 <sup>b</sup> |
| <i>SATI (cm<sup>2</sup>/m<sup>2</sup>), median (IQR)</i> |                          |                          |                          |                    |
| All Patients                                             | 45.9 (31.4–72.9)         | 39.1 (36.4–57.3)         | 46.7 (27.9–83.7)         | 0.708 <sup>b</sup> |
| Female                                                   | 71.3 (46.4–105.3)        | 60.7 (38.7–96.8)         | 72.9 (48.4–113.6)        | 0.304 <sup>b</sup> |
| Male                                                     | 36.5 (20.5–46.5)         | 37.2 (33.0–41.4)         | 34.0 (18.8–47.0)         | 0.556 <sup>b</sup> |
| <i>SAT attenuation (HU), median (IQR)</i>                |                          |                          |                          |                    |
| All Patients                                             | -100.7 (-108.0 to -91.4) | -99.6 (-104.5 to -96.0)  | -101.7 (-108.5 to -84.5) | 0.753 <sup>b</sup> |
| Female                                                   | -104.8 (-112.2 to -94.0) | -102.8 (-113.0 to -96.5) | -105.4 (-112.2 to -92.7) | 0.711 <sup>b</sup> |
| Male                                                     | -97.4 (-103.7 to -84.5)  | -97.6 (-101.4 to -92.4)  | -97.1 (-104.8 to -80.2)  | 0.847 <sup>b</sup> |

**Inflammatory indexes**

|                          |                     |                    |                     |                          |
|--------------------------|---------------------|--------------------|---------------------|--------------------------|
| <i>NLR, median (IQR)</i> | 3.1 (2.1–4.8)       | 2.9 (2.0–3.9)      | 3.7 (2.1–5.6)       | 0.211 <sup>b</sup>       |
| <i>LMR, median (IQR)</i> | 2.7 (1.8–3.8)       | 3.4 (2.5–4.9)      | 2.5 (1.7–3.3)       | <b>0.013<sup>b</sup></b> |
| <i>PLR, median (IQR)</i> | 163.5 (127.1–265.3) | 132.4 (99.3–163.2) | 179.8 (133.6–282.3) | <b>0.003<sup>b</sup></b> |

Abbreviations: HU: Hounsfield Units; IMAT: Intramuscular adipose tissue; IQR: Interquartile Range; NLR: Neutrophil to Lymphocyte Ratio; LMR: lymphocyte to monocyte ratio; PLR: Platelet to Lymphocyte Ratio; SAT: subcutaneous adipose tissue; SD: Standard Deviation; SATI: Subcutaneous Fat Index; SMI: Skeletal Muscle Index; VAT: Visceral adipose tissue; VATI: Visceral Fat Index. aStudent's T test; bMann-Whitney test.

**2 Supplementary table 2. Body composition and inflammatory indexes according to myosteatosi s of stage I-III rectal cancer patients.**

| Characteristic                                       | All-patients, n=109 | No myosteatosi s, n=45 | Myosteatosi s, n=64 | P value                      |
|------------------------------------------------------|---------------------|------------------------|---------------------|------------------------------|
| <b>Skeletal muscle</b>                               |                     |                        |                     |                              |
| <i>Area (cm<sup>2</sup>), mean (SD)</i>              |                     |                        |                     |                              |
| All Patients                                         | 134.3 (30.6)        | 144.1 (32.8)           | 127.4 (27.2)        | <b>0.005<sup>a</sup></b>     |
| Female                                               | 112.5 (23.5)        | 122.9 (27.4)           | 105.3 (17.4)        | <b>0.011<sup>a</sup></b>     |
| Male                                                 | 150.2 (25.0)        | 159.6 (27.5)           | 143.6 (21.1)        | <b>0.011<sup>a</sup></b>     |
| <i>Radiodensity (HU), mean (SD)</i>                  |                     |                        |                     |                              |
| All Patients                                         | 34.4 (10.1)         | 43.3 (7.1)             | 28.1 (6.6)          |                              |
| Female                                               | 32.6 (9.8)          | 41.4 (5.5)             | 26.5 (7.0)          |                              |
| Male                                                 | 35.6 (10.3)         | 44.8 (7.9)             | 29.2 (6.1)          |                              |
| <i>SMI (cm<sup>2</sup>/m<sup>2</sup>), mean (SD)</i> |                     |                        |                     |                              |
| All Patients                                         | 50.8 (9.3)          | 54.3 (9.1)             | 48.3 (8.7)          | <b>0.001<sup>a</sup></b>     |
| Female                                               | 46.8 (9.5)          | 51.2 (10.2)            | 43.8 (7.9)          | <b>0.008<sup>a</sup></b>     |
| Male                                                 | 53.7 (8.0)          | 56.7 (7.4)             | 51.6 (7.7)          | <b>0.011<sup>a</sup></b>     |
| <i>IMAT, area (cm<sup>2</sup>), median (IQR)</i>     |                     |                        |                     |                              |
| All Patients                                         | 9.2 (6.3–15.4)      | 7.3 (5.3–8.6)          | 13.4 (8.7–18.3)     | <b>&lt;0.001<sup>b</sup></b> |
| Female                                               | 9.8 (7.5–15.9)      | 8.5 (5.8–9.7)          | 15.0 (8.6–18.7)     | <b>&lt;0.001<sup>b</sup></b> |
| Male                                                 | 9.2 (6.0–14.6)      | 6.4 (4.5–8.0)          | 13.0 (9.2–17.9)     | <b>&lt;0.001<sup>b</sup></b> |
| <b>Visceral adipose tissue</b>                       |                     |                        |                     |                              |
| <i>VAT area (cm<sup>2</sup>), median (IQR)</i>       |                     |                        |                     |                              |
| All Patients                                         | 128.9 (74.4–191.3)  | 101.3 (56.3–163.5)     | 149.2 (83.7–218.1)  | <b>0.006<sup>b</sup></b>     |

|                                                          |                           |                           |                           |                          |
|----------------------------------------------------------|---------------------------|---------------------------|---------------------------|--------------------------|
| Female                                                   | 117.2 (65.0–174.3)        | 94.3 (49.0–151.3)         | 128.4 (74.4–199.5)        | <b>0.041<sup>b</sup></b> |
| Male                                                     | 141.9 (78.0–210.0)        | 122.8 (62.2–174.3)        | 170.1 (88.2–224.5)        | <b>0.049<sup>b</sup></b> |
| <i>VATI (cm<sup>2</sup>/m<sup>2</sup>), median (IQR)</i> |                           |                           |                           |                          |
| All Patients                                             | 48.4 (28.0–71.2)          | 39.5 (21.9–61.4)          | 55.4 (32.5–82.9)          | <b>0.004<sup>b</sup></b> |
| Female                                                   | 46.4 (28.3–74.3)          | 38.0 (22.7–67.2)          | 54.2 (31.9–89.4)          | <b>0.039<sup>b</sup></b> |
| Male                                                     | 48.9 (27.6–70.2)          | 42.3 (21.0–61.1)          | 56.5 (33.0–80.3)          | <b>0.032<sup>b</sup></b> |
| <i>VAT attenuation (HU), median (IQR)</i>                |                           |                           |                           |                          |
| All Patients                                             | -97.2 (-103.7 to -90.3)   | -96.18(-100.0 to -85.2)   | -101.8 (-105.1 to -93.1)  | <b>0.004<sup>b</sup></b> |
| Female                                                   | -98.6 (-103.4 to -93.1)   | -96.4 (-100.8 to -91.5)   | -102.0 (-103.9 to -93.1)  | 0.090 <sup>b</sup>       |
| Male                                                     | -96.8 (-104.8 to -88.6)   | -93.2 (-99.8 to -83.9)    | -99.5 (-105.9 to -93.2)   | <b>0.017<sup>b</sup></b> |
| <b>Subcutaneous adipose tissue</b>                       |                           |                           |                           |                          |
| <i>SAT area (cm<sup>2</sup>), median (IQR)</i>           |                           |                           |                           |                          |
| All Patients                                             | 131.6 (89.5–205.6)        | 117.5 (82.6–210.2)        | 142.9 (93.5–204.7)        | 0.763 <sup>b</sup>       |
| Female                                                   | 199.7 (145.6–273.6)       | 211.6 (162.5–273.6)       | 190.2 (145.1–281.5)       | 0.189 <sup>b</sup>       |
| Male                                                     | 102.2 (78.3–133.4)        | 92.2 (78.3–117.5)         | 108.7 (82.4–153.6)        | 0.361 <sup>b</sup>       |
| <i>SATI (cm<sup>2</sup>/m<sup>2</sup>), median (IQR)</i> |                           |                           |                           |                          |
| All Patients                                             | 48.8 (34.8–82.6)          | 43.8 (32.0–84.4)          | 52.1 (37.3–78.7)          | 0.361 <sup>b</sup>       |
| Female                                                   | 85.2 (60.9–112.1)         | 86.1 (73.2–97.3)          | 81.2 (59.8–112.5)         | 0.798 <sup>b</sup>       |
| Male                                                     | 38.4 (29.6–46.7)          | 34.4 (30.1–42.8)          | 39.8 (29.6–51.9)          | 0.141 <sup>b</sup>       |
| <i>SAT attenuation (HU), median (IQR)</i>                |                           |                           |                           |                          |
| All Patients                                             | -102.5 (-108.3 to -96.9)  | -99.5 (-104.7 to -93.9)   | -104.8 (-109.8 to -97.9)  | <b>0.004<sup>b</sup></b> |
| Female                                                   | -106.0 (-111.1 to -102.1) | -104.3 (-107.7 to -100.1) | -107.3 (-113.0 to -104.4) | <b>0.032<sup>b</sup></b> |

|      |                         |                         |                          |                          |
|------|-------------------------|-------------------------|--------------------------|--------------------------|
| Male | -98.7 (-105.0 to -93.1) | -97.2 (-100.0 to -91.6) | -100.2 (-108.4 to -96.7) | <b>0.021<sup>b</sup></b> |
|------|-------------------------|-------------------------|--------------------------|--------------------------|

**Inflammatory indexes**

|                          |                     |                     |                     |                    |
|--------------------------|---------------------|---------------------|---------------------|--------------------|
| <i>NLR, median (IQR)</i> | 2.4 (1.7–3.4)       | 2.4 (1.6–3.4)       | 2.3 (1.7–3.4)       | 0.877 <sup>b</sup> |
| <i>LMR, median (IQR)</i> | 3.3 (2.4–4.8)       | 3.4 (2.6–5.0)       | 3.3 (2.0–4.5)       | 0.227 <sup>b</sup> |
| <i>PLR, median (IQR)</i> | 133.5 (110.6–178.3) | 126.3 (106.0–168.5) | 139.9 (113.7–190.5) | 0.256 <sup>b</sup> |

Abbreviations: HU: Hounsfield Units; IMAT: Intramuscular adipose tissue; IQR: Interquartile Range; NLR: Neutrophil to Lymphocyte Ratio; LMR: lymphocyte to monocyte ratio; PLR: Platelet to Lymphocyte Ratio; SAT: subcutaneous adipose tissue; SD: Standard Deviation; SATI: Subcutaneous Fat Index; SMI: Skeletal Muscle Index; VAT: Visceral adipose tissue; VATI: Visceral Fat Index. aStudent's T test; bMann-Whitney test.
